# Supplementary material
Source: MDPI journal article supplement (https://www.mdpi.com/1424-2818/11/5/83)
Supplement: s1 [file database_493269.xlsx]

## Sheet: dados
sub-region	lat	lon	sp	M	PA	diet_RP	diet_VP	diet_Pr	area	shape	TAR	PS	NPP	FH	Ve	Wa	Pl	RA	DR	DB
Me	18.3793	-94.7692	1	1	no	1	1	na	58.52	5.71208	16	66.3504	127.091	15	0.175032	0	0	0.0160769	0.970152	0.295718
Me	10.4679	-83.9541	1	1	yes	1	1	1	23.48	2.01429	10.5	37.3124	127.727	21	0.0893345	0.148771	0	0.00515491	1.35574	1.37464
Me	16.181	-90.874	1	1	no	1	1	na	532.85	5.06911	14.8	60.7473	180.364	0	0.205152	0.0219344	0	0.0156531	0.60234	0.3439
Me	18.2736	-90.7319	1	1	no	1	1	na	2228.54	3.94273	19.4	74.5133	153.364	17	0.162152	0.0168815	0	0.0286476	0.6273	1.24585
TCM	7.94364	-76.2519	0.75	0.478494	no	0.693727	0.823529	1	35.75	2.76003	9.2	66.8771	108.955	0	0.0345815	0.908654	0	0	0.143246	0.143246
Me	18.4667	-91.1833	0.5	0.566269	no	0.34127	0.818182	na	148	3.59647	18.9	72.7652	131.5	11	0.357293	0	0	0	0.623243	0.786426
Me	18.15	-91.6167	1	1	no	1	1	na	374.62	4.12464	18.5	64.1743	120.636	10	0.217991	0	0	0	0.882988	1.59683
Me	18.5833	-88.45	1	1	no	1	1	na	234.94	3.31828	14.5	57.2157	132.636	14	0.312624	0.0972495	0	0	1.89451	8.47243
Me	17.9333	-88.8667	0.5	0.433731	no	0.34127	0.818182	na	5419.83	7.27888	15.6	55.575	136.909	12	0.430289	0.035451	0	0.0310731	0.67664	0.677608
Me	21.2333	-88.55	0.5	0.566269	no	0.65873	0.181818	na	9.71	4.31821	17.8	61.4502	106.409	0	0.109098	0	0	0	1.44982	2.16413
TCM	5.67503	-74.7744	0.25	0.415884	no	0.158672	0.794118	0	489.75	4.18612	10.8	40.5888	157.864	28	0.196381	0.0819914	0	0	0.477543	0.921786
TCM	5.64133	-74.8364	0.25	0.0398173	no	0.232472	0.0147059	0.595238	94.53	3.2786	10.8	31.0574	167.636	29	0.425679	0.000949523	0	0	1.13074	2.76179
TCM	5.57532	-74.9576	0.5	0.455701	no	0.391144	0.808824	0.595238	418.01	5.09405	10.6	32.8382	160.636	25	0.474775	0.00082075	0	0.00129403	0.507582	3.97551
TCM	5.33933	-74.7355	0.25	0.0398173	no	0.232472	0.0147059	0.595238	72.36	7.11997	11.1	38.0181	143.182	14	0.0588539	0.0960236	0	0.0221289	1.46742	3.80612
Am	-6.02553	-76.9927	0.25	0.0482271	no	0.233266	0.261538	0.245033	5.56	1.71078	12.9	28.9763	165.364	14	0.273523	0	0	0.124693	0.858815	2.59532
Am	-4.30787	-49.4944	0.333333	0.553124	no	0.265363	0.909091	0.194805	15.03	2.16109	11.5	78.7515	255	0	0.0316527	0.968347	0	0	0	0
Me	18.6868	-95.1885	0.5	0.413832	no	0.34127	0.818182	na	3.7	3.945	16.2	73.6734	107.636	14	0.098314	0.0745125	0.0019377	0.0670275	0.530671	3.24861
TCM	6.71207	-74.1456	1	1	no	1	1	1	103.96	3.19277	10.5	52.0216	177.545	16	0.107598	0.0289543	0	0	0	0.0802542
Me	17.3052	-88.4462	1	1	yes	1	1	na	8897.27	3.65608	13.3	52.5308	136.955	23	0.247589	0.0264981	0	0	0.351408	0.651097
Me	16.3707	-88.4945	0.5	0.459766	no	0.34127	0.818182	na	51.58	3.49971	13.4	56.6236	255	18	0.568973	0.0421019	0	0.00247282	0.639659	0
Or	3.60874	-73.6388	0.714286	0.410872	no	0.641892	0.810606	0.918919	33.72	3.77947	11.2	49.8921	99.5909	14	0.105418	0	0.109315	0	0.545192	0.86367
Or	3.61666	-73.6461	0.714286	0.410872	no	0.641892	0.810606	0.918919	23.11	2.11251	11.2	49.4722	99.5909	15	0.0822462	0	0.0705298	0	0.54637	1.2458
Or	3.61726	-73.6413	0.571429	0.367879	no	0.513514	0.55303	0.846847	6.68	1.4953	11.2	50.4623	99.5909	17	0.113849	0	0.0913482	0	0.596113	1.60801
Or	3.59999	-73.6255	0.428571	0.333719	no	0.308559	0.530303	0.792793	0.84	1.1696	11.3	50.3223	98.8636	17	0.171924	0	0.071187	0	0.614209	0
Or	3.59355	-73.6332	0.428571	0.333719	no	0.308559	0.530303	0.792793	4.14	2.0519	11.3	50.3223	98.8636	16	0.198593	0	0.0001963	0	0.676693	0.941487
Or	3.59424	-73.6245	0.714286	0.410872	no	0.641892	0.810606	0.918919	14.67	1.2668	11.2	50.7705	98.8636	17	0.133498	0	0.00202554	0	0.694928	0.625874
Or	3.59948	-73.6462	0.571429	0.38112	no	0.547297	0.810606	0.396396	118.82	4.94292	11.2	50.5123	98.8636	15	0.0919452	0	0.167811	0	0.768017	1.91395
Or	3.57801	-73.4445	0.714286	0.410872	yes	0.641892	0.810606	0.918919	1146.66	2.93405	11.1	53.4633	107.045	34	0.20195	0	0	0	0.0869016	0.115458
Or	3.56545	-73.4483	0.714286	0.410872	yes	0.641892	0.810606	0.918919	691.29	7.33981	11.1	51.4815	107.045	15	0.328312	0	0	0	0.162602	0.0685939
Or	3.56193	-73.4755	0.428571	0.333719	yes	0.308559	0.530303	0.792793	151.93	2.2932	11.1	51.5761	107.045	16	0.24188	0	0	0	0.136071	0
Me	10.4117	-84.1142	0.666667	0.820514	yes	0.605769	0.985075	0	644.91	4.30556	10.6	37.734	131.955	36	0.311514	0.0213207	0.0022485	0.0606571	1.70936	5.99587
Am	2.37299	-72.641	1	1	no	1	1	1	154.98	3.06815	11.9	55.4883	104.909	18	0.212986	0	0	0	1.01701	1.98672
Am	-3.86994	-49.642	0.666667	0.900329	no	0.649718	0.67619	0.705426	125.94	1.98582	11.9	79.3741	91.9545	29	0.170545	0.826283	0	0	0	0
Am	-4.27327	-49.5045	0.428571	0.683977	no	0.418708	0.8875	0.20625	16.39	1.57476	11.6	79.3577	94	0	0.13138	0.86862	0	0	0	0
Am	-2.34227	-60.095	0.571429	0.432335	no	0.598361	0.653061	0.350515	100.1	1.12782	10.5	37.9586	128.864	31	0.931033	0	0	0	0.282594	0
Am	-2.40446	-59.8713	0.142857	0.242987	no	0.0881148	0.55102	0	14.49	1.11161	10.5	39.2223	129.409	30	0.323774	0	0	0	0.891495	0.859273
Ca	10.04	-74.9749	0.666667	0.64574	no	0.56383	0.982143	0.595238	35.7	1.3975	12.3	69.5066	91.8182	10	0.103409	0.00124268	0	0.0660394	0.727419	0.887626
AF	-22.8086	-46.9929	0.25	0.530678	yes	0.221649	0.627907	0	4.09	1.19959	17	67.405	108.5	0	0.0129139	0	0.0577247	0.0409342	1.28829	6.00135
AF	-22.7789	-47.0016	0.75	0.675453	yes	0.731959	0.813953	0.423077	25.38	1.39988	17.6	68.1838	98.2727	0	0.199936	0.0313674	0	0.184979	1.69954	13.8782
AF	-21.1935	-43.6992	0.5	0.175083	yes	0.510309	0.186047	0.423077	327.22	4.62225	16.6	77.3331	101.409	0	0.244622	0.00030337	0.0152955	0.0365526	2.62803	16.0857
AF	-23.7536	-53.1365	1	1	no	1	1	1	203.99	3.31621	19.9	25.0729	78.5909	19	0.158234	0.0076246	0	0	0.844953	5.92669
Me	17.7946	-93.1099	0.5	0.413832	no	0.34127	0.818182	na	29.97	1.57164	17.4	52.4543	92.3182	10	0.0095109	0.0019306	0	0.0406044	1.27011	1.22801
Am	-1.78336	-59.6877	0.375	0.686473	yes	0.335849	0.836735	0.193548	14.44	1.34366	9.4	40.8099	68.7727	0	0.308456	0.691544	0	0	0	0
Am	-1.83142	-59.6872	0.5	0.791829	yes	0.511321	0.846939	0.212903	105.61	2.16306	9.7	40.6932	80.3636	0	0.330269	0.669731	0	0	0	0
Am	-1.73936	-59.4423	0.625	0.813564	yes	0.637736	0.846939	0.406452	190.15	2.37918	9.6	43.1924	94.6818	32	0.54488	0.45512	0	0	0	0
Am	-1.74169	-59.7032	0.75	0.87337	yes	0.80566	0.938776	0.412903	599.65	4.17248	9.4	40.3035	86.5909	27	0.289589	0.710411	0	0	0	0
Am	-1.59269	-59.6273	0.625	0.851636	yes	0.679245	0.938776	0.219355	1716.63	5.23036	9.4	40.6994	84.0455	29	0.430919	0.569081	0	0	0	0
Am	-11.4881	-61.439	1	1	yes	1	1	1	186.07	1.96256	16.7	77.3262	95.9545	20	0.139849	0.00647886	0	0.0362283	1.28757	2.05027
AF	-20.6874	-42.8733	0.2	0.0718138	no	0.329268	0.121212	0	29.3	2.70476	20.7	77.0556	85.5455	16	0.140214	0	0.0577421	0.00817439	1.89967	9.61676
AF	-6.56674	-35.1312	0.666667	0.396909	no	0.619469	0.228571	1	118.25	3.71482	13.6	62.4874	78.9545	12	0.0808754	0	0.0501707	0	1.05411	3.33444
Ca	10.6354	-75.2466	0.75	0.598731	no	0.813853	0.509091	1	383.79	3.97715	9.7	70.2008	106.227	15	0.101635	0.0118614	0	0.000989751	1.19194	1.47795
Ce	-21.5803	-47.8072	0.75	0.683774	yes	0.731959	0.813953	0.423077	3630.9	2.3712	18.6	72.1071	106.273	37	0.222836	0.0217409	0.0110098	0.000500356	0.314178	0.254783
Ce	-20.3929	-54.5876	0.666667	0.964648	yes	0.840708	1	0.576923	162.72	1.76252	16.2	54.0176	71.9091	19	0.0150833	0	0.00439737	0.2972	0.853269	5.09055
AF	-13.9528	-39.4512	0.6	0.502281	no	0.537367	0.372093	0.852459	3189.03	4.41889	10.3	12.8333	163.273	24	0.309113	0.00460247	0	0	0.965715	8.44745
AF	-15.9269	-39.6359	0.8	0.570073	no	0.846975	0.372093	1	2495.18	3.94185	12.4	29.7282	99.1818	26	0.0437872	0.0317079	0	0	0.449487	1.15956
AF	-21.3686	-46.2789	0.4	0.508038	no	0.627358	0.372093	0.405405	508.9	1.70441	20.9	73.4127	100.545	27	0.0570561	0	0.0151001	0.00308866	1.23681	2.69165
AF	-22.8947	-46.3236	0.5	0.304844	no	0.537879	0.530303	0.297297	3037.74	4.73692	18.3	66.5996	116.636	28	0.0961294	0.00228703	0.0621269	0.105606	1.40677	9.69091
Ce	-21.1142	-47.6638	0.5	0.329868	no	0.360825	0.186047	1	122.62	2.61628	17.5	72.1609	94.0909	19	0.0410416	0.0172323	0	0	0.521839	0.346506
Am	-3.40347	-51.7363	0.111111	0.200152	no	0.0786106	0.45	0	348.17	1.32133	10.3	71.9624	115.227	0	0.181348	0.720057	0	0	0	0
Ce	-19.2578	-43.5169	0.5	0.801991	yes	0.38125	0.771429	0.5	39.9	1.69258	17.7	82.7624	80.1364	0	0.0219572	0	0	0	0.457922	0
Ce	-18.9257	-48.1549	0.25	0.0309043	no	0.0927835	0	0.423077	34.37	1.66006	17.1	84.3351	77.8182	11	0.171913	0	0.00589267	0	1.33581	5.80788
Ca	9.45934	-75.3612	0.6	0.363586	no	0.598726	0.459016	1	34.21	8.61391	10.7	59.7416	92.6364	11	0.0486337	0.00108836	0.000485965	0.013866	1.02024	6.06646
Ca	9.47389	-75.3489	0.6	0.363586	no	0.598726	0.459016	1	42.63	4.64458	10.7	61.6542	92.6364	11	0.0449592	0.000779179	0	0.0122581	1.1018	10.7356
Ce	-21.2189	-47.8462	0.5	0.344192	yes	0.360825	0.186047	1	207.71	2.47799	17.8	73.5335	92.1364	19	0.0595004	0.000434153	0.00742854	0.22774	1.03764	7.24244
TCM	6.89746	-74.5783	0.2	0.023913	no	0.181556	0.0123457	0.490196	204.95	2.95571	10.3	41.3192	163.955	27	0.219964	0.0177452	0	0	0	0
TCM	6.90745	-74.5724	0.2	0.023913	no	0.181556	0.0123457	0.490196	32.81	1.65967	10.3	43.9093	160	23	0.160776	0.00688335	0	0	0	0
AF	-21.4233	-46.0948	0.25	0.112188	no	0.417526	0.186047	0	33.37	1.71894	20.4	74.0385	88.5455	0	0.025599	0.348512	0.00253935	0	1.02984	3.89845
Ch	-17.9237	-63.1655	0.375	0.144353	yes	0.296037	0.289017	0.483871	115.24	3.36097	16.8	48.1145	86.4545	12	0.173956	0.00959554	0.00409455	0	0.712293	2.72214
Ch	-17.927	-63.1482	0.375	0.144353	yes	0.296037	0.289017	0.483871	517.65	3.25219	16.8	47.8873	86.4545	20	0.305564	0.0073217	0.00232057	0	1.01501	4.17832
Ch	-17.7802	-63.0664	0.625	0.42619	no	0.608392	0.618497	0.532258	243.41	2.5404	16.6	48.0661	74.4545	16	0.240162	0.012874	0	0.214709	1.13788	0.657257
Ch	-17.8119	-62.953	0.125	0.035463	no	0.132867	0.196532	0.0645161	2.84	1.65719	16.7	49.0921	70.6818	0	0.146701	0	0.00128244	0	1.40314	12.5729
Ch	-17.8212	-62.9519	0.375	0.17515	no	0.4662	0.306358	0.354839	6.79	3.33435	16.8	48.977	70.6818	0	0.120154	0	0	0	0.807043	7.14864
Ch	-17.8444	-62.9281	0.25	0.130168	no	0.254079	0.289017	0.306452	413.82	2.32831	16.8	49.0195	70.6818	14	0.103423	0	0	0	1.10763	3.71731
Ch	-17.9103	-62.9361	0.25	0.10889	no	0.16317	0.0924855	0.419355	25.62	2.25715	17.1	49.5159	75.6364	0	0.124901	0	0	0	2.6013	4.74242
Ch	-17.8901	-62.9151	0.25	0.10889	no	0.16317	0.0924855	0.419355	28.74	2.66258	16.9	49.4184	70.6818	0	0.129364	0	0	0	2.8818	10.0405
Ch	-17.8872	-62.9082	0.375	0.144353	no	0.296037	0.289017	0.483871	5.43	2.15484	17	49.4653	70.6818	0	0.216157	0	0	0	2.67506	8.09923
Me	9.15496	-79.8437	0.75	0.533512	yes	0.693727	0.823529	1	1533.51	3.88276	8.2	64.4832	100.409	36	0.0573367	0.942663	0	0	0	0
Ce	-22.6336	-48.29	0.4	0.404381	no	0.386179	0.530303	0.576923	253.79	1.15984	19.2	68.1201	90.5909	25	0	0.0274686	0	0	0.960454	0.206994
Ce	-22.6659	-48.1926	1	1	no	1	1	1	524.22	1.46371	18.7	68.1177	99.5909	26	0.0635849	0.045954	0	0	0.623857	0.864068
Ce	-22.6944	-48.0845	0.8	0.976407	no	0.926829	1	0.576923	308.79	1.61175	18.2	69.092	89.0455	23	0.0736047	0	0	0	0.93331	0.392708
Am	-4.14141	-49.512	0.666667	0.783301	no	0.553073	0.987013	0.785714	71.01	1.64033	12.2	77.0622	104.773	0	0.301287	0.151227	0	0.00894939	0.937087	6.18169
Am	-2.94698	-54.8058	0.428571	0.398003	no	0.293059	0.598291	0.415254	1043.25	2.21925	12.1	64.8591	122.091	29	0.190868	0.00424163	0	0.00331127	1.26399	1.60062
Am	-3.36557	-54.8786	1	1	no	1	1	1	3059.75	1.93129	11.8	62.4796	138.864	33	0.236718	0	0	0	0.641436	0.402446
Am	-4.05998	-54.9103	1	1	no	1	1	1	376.78	2.25259	11.9	54.8143	135.909	30	0.287909	0.00632402	0	0	0.195975	0.37262
Am	-3.95	-54.8681	0.857143	0.608733	no	0.786632	0.897436	1	398.15	1.90856	11.7	55.8722	139.455	33	0.532902	0.00174985	0	0	0.864539	0.897337
Ca	9.58754	-75.3368	0.4	0.246513	no	0.33758	0.45082	0.595238	53.67	3.03813	10.3	63.7995	113.182	24	0.268682	0	0	0	0	0.703953
Ca	9.49881	-75.3862	0.2	0.226992	no	0.136943	0.442623	0	622.4	3.52224	10.4	63.3723	92.6364	23	0.124796	0.00106499	0	0	0.706465	2.99401
Ca	9.57615	-75.4674	0.2	0.226992	no	0.136943	0.442623	0	807.99	2.9038	9.9	60.9743	92.7727	24	0.116408	0.00104759	0	0	0.541767	1.18504
Ca	9.43568	-75.3733	0.4	0.246513	no	0.33758	0.45082	0.595238	0.8	2.01851	10.6	60.336	92.6364	10	0.058383	0.00207505	0	0.0325198	2.77732	5.97501
Ca	9.42692	-75.4526	0.2	0.226992	no	0.136943	0.442623	0	26.65	2.16939	10.3	63.5904	78.1364	0	0.0493883	0.0159481	0	0	1.07678	2.67569
Ca	9.9405	-75.1009	0.4	0.246513	no	0.33758	0.45082	0.595238	699.29	1.62254	11.2	62.9071	103	17	0.0213722	0.00112091	0	0.088908	1.45454	3.463
AF	-6.75844	-35.1083	0.666667	0.396909	no	0.619469	0.228571	1	1137.71	4.89171	13.2	62.9661	97.0909	25	0.217884	0	0	0	1.23583	1.00686
AF	-8.52527	-35.0534	0.666667	0.396909	no	0.619469	0.228571	1	25.29	1.94648	9.3	58.7676	123.273	14	0.0638535	0	0	0	0.28249	0
AF	-9.75724	-36.2402	0.666667	0.396909	no	0.619469	0.228571	1	693.84	2.8637	12.7	66.095	81.6364	15	0.046972	0.0194565	0	0.00304606	0.596985	0.372119
AF	-16.0422	-40.0589	0.8	0.932208	no	0.690391	1	0.852459	414.5	2.66309	14.8	53.6	87.7273	0	0.0205575	0.00601351	0	0	1.25435	0.35618
Am	-11.7159	-61.4869	1	1	yes	1	1	1	1055.36	3.47601	16.5	75.2201	104.227	17	0.0941499	0.000474384	0	0	0.942969	4.81504
TCM	6.04834	-74.2654	1	1	yes	1	1	1	122.82	2.28834	10.5	38.8278	181.318	32	0.433555	0.00338736	0	0.00660508	0.775752	1.2438
