# Supplementary material
Source: MDPI journal article supplement (https://www.mdpi.com/1424-2818/11/5/83)
Supplement: s1 [file s1]

SUPPORTING INFORMATION

# **Effect of Site Attributes and Matrix Composition on Neotropical Primate Species Richness and Functional Traits: a Comparison Among Regions**

**Bayron R. Calle-Rendón <sup>1,2,\*</sup>, Renato R. Hilário <sup>1,2</sup> and José Julio de Toledo <sup>1,2</sup>**

<sup>1</sup> Programa de Pós-Graduação em Biodiversidade Tropical, Universidade Federal do Amapá, Rod. JK Km02, Macapá, Brazil; jjuliotoledo@gmail.com (J.J.T.)

<sup>2</sup> Laboratório de Ecologia, Universidade Federal do Amapá, Rod. JK km02, Macapá, Brazil; renatohilario@gmail.com (R.R.H.)

\* Correspondence: brcalle@unal.edu.co

Corresponding author, e-mail: brcalle@unal.edu.co

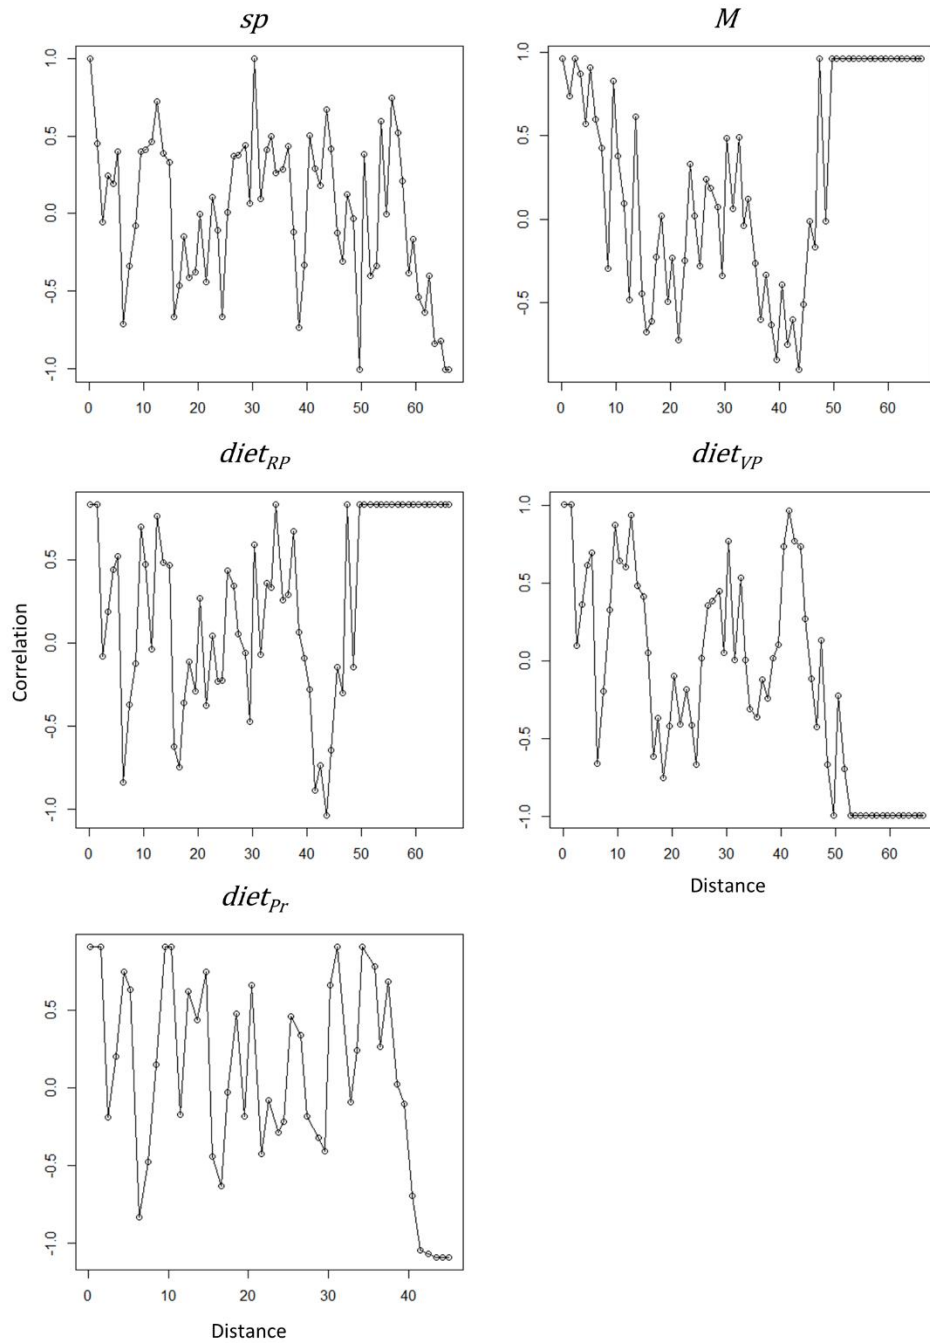

**Figure S1.** Moran's I correlograms of the residuals of each model. Species retention (*sp*), mass retention (*M*), species retention with diet composed of reproductive parts of the plant (*diet<sub>RP</sub>*), species retention with diet composed of vegetative parts of the plant (*diet<sub>VP</sub>*), species retention with diet composed of prey (*diet<sub>PR</sub>*).

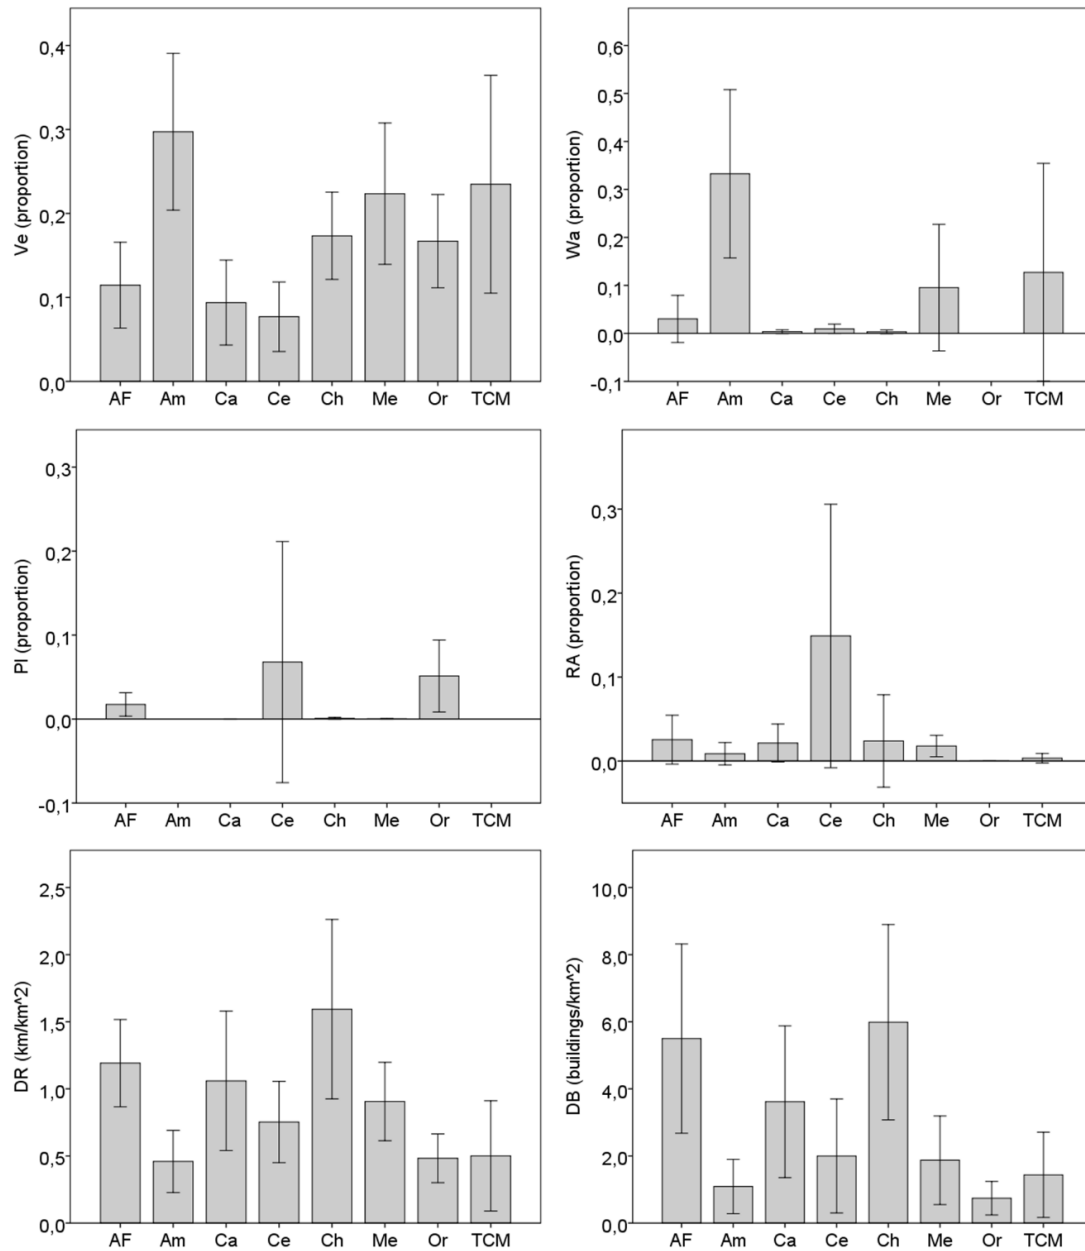

**Figure S2.** Proportion of matrix components among eight sub-regions in the Neotropics. Landscape attributes: forest vegetation (Ve), plantations (Pl), water bodies (Wa), residential areas (RA), density of buildings (DB) and density of roads (DR). Sub-regions: Atlantic Forest (AF), Amazonia (Am), Caribbean (Ca), Cerrado (Ce), Chaco (Ch), Mesoamerica (Me), Orinoco (Or), Tumbes-Chocó-Magdalena (TCM).

**Table S1.** List of 97 fragments (Fr) and species used in the analysis. Sub-regions are Amazonia (Am), Caribbean (Ca), Cerrado (Ce), Atlantic Forest (AF), Mesoamerica (Me), Orinoco (Or), Chaco (Ch) and Tumbes-Chocó-Magdalena (TCM). PA indicate if the fragment is within a protected area. Methods used in each work were based on direct observation (do), such as transect lines, behavior studies and walks; auditory records (ar), such as playbacks and interviews (in). The number 1 and 0 in each species indicate the presence or absence, respectively. Countries are Colombia (Co), Mexico (Mx), Costa Rica (CR), Peru (Pe), Brazil (Br), Belize (Be), Panama (Pa) and Bolivia (Bo). NI is no information.

| Fr | Sub-region | Country | PA  | Year image | Year field | Method   | Species 1                           | Species 2                       | Species 3                           | Species 4                      | Species 5                           | Species 6                        | Species 7 | Species 8 | Species 9 |
|----|------------|---------|-----|------------|------------|----------|-------------------------------------|---------------------------------|-------------------------------------|--------------------------------|-------------------------------------|----------------------------------|-----------|-----------|-----------|
| 1  | AF         | Br      | yes | 2008       | 2007       | do       | <i>Callithrix penicillata</i> 0     | <i>Alouatta guariba</i> 1       | <i>Cebus nigratus</i> 0             | <i>Callicebus nigrifrons</i> 0 |                                     |                                  |           |           |           |
| 2  | AF         | Br      | yes | 2008       | 2007       | do       | <i>Callithrix penicillata</i> 1     | <i>Alouatta guariba</i> 1       | <i>Cebus nigratus</i> 0             | <i>Callicebus nigrifrons</i> 1 |                                     |                                  |           |           |           |
| 3  | AF         | Br      | yes | 2013       | 2013       | do       | <i>Callicebus</i> sp 1              | <i>Callithrix penicillata</i> 1 | <i>Alouatta guariba</i> 0           | <i>Sapajus nigratus</i> 0      |                                     |                                  |           |           |           |
| 4  | AF         | Br      | no  | 2011       | 2008       | do       | <i>Cebus nigratus</i> 1             | <i>Alouatta caraya</i> 1        |                                     |                                |                                     |                                  |           |           |           |
| 5  | AF         | Br      | no  | 2012       | 2011       | do       | <i>Callithrix penicillata</i> 0     | <i>Callicebus nigrifrons</i> 1  | <i>Alouatta guariba clamitans</i> 0 | <i>Sapajus nigratus</i> 0      | <i>Brachyteles hypoxanthus</i> 0    |                                  |           |           |           |
| 6  | AF         | Br      | no  | 2013       | 2013       | do       | <i>Sapajus flavius</i> 1            | <i>Callithrix jacchus</i> 1     | <i>Alouatta belzebul</i> 0          |                                |                                     |                                  |           |           |           |
| 7  | AF         | Br      | no  | 2016       | 2000       | do/in/ar | <i>Callithrix</i> sp 1              | <i>Callicebus melanochir</i> 1  | <i>Cebus</i> sp 1                   | <i>Alouatta guariba</i> 0      | <i>Leontopithecus chrysomelas</i> 0 |                                  |           |           |           |
| 8  | AF         | Br      | no  | 2015       | 2000       | do/in/ar | <i>Callithrix</i> sp 1              | <i>Callicebus melanochir</i> 1  | <i>Cebus</i> sp 1                   | <i>Alouatta guariba</i> 0      | <i>Leontopithecus chrysomelas</i> 1 |                                  |           |           |           |
| 9  | AF         | Br      | no  | 2010       | 2010       | do/ar    | <i>Alouatta guariba clamitans</i> 0 | <i>Callithrix aurita</i> 0      | <i>Callithrix penicillata</i> 0     | <i>Sapajus nigratus</i> 1      | <i>Callicebus nigrifrons</i> 1      |                                  |           |           |           |
| 10 | AF         | Br      | no  | 2010       | 2010       | do/ar    | <i>Alouatta guariba clamitans</i> 1 | <i>Callithrix aurita</i> 1      | <i>Callithrix penicillata</i> 0     | <i>Sapajus nigratus</i> 0      | <i>Callicebus nigrifrons</i> 1      | <i>Brachyteles arachnoides</i> 0 |           |           |           |
| 11 | AF         | Br      | no  | 2013       | 2010       | ar       | <i>Callithrix aurita</i> 0          | <i>Callicebus nigrifrons</i> 1  | <i>Sapajus nigratus</i> 0           | <i>Alouatta caraya</i> 0       |                                     |                                  |           |           |           |
| 12 | AF         | Br      | no  | 2013       | 2009       | in       | <i>Sapajus</i>                      | <i>Alouatta</i>                 | <i>Callithrix</i>                   |                                |                                     |                                  |           |           |           |

|    |    |    |     |      |      |       |                                          |                              |                                 |                                        |                                     |                                |                             |                           |                               |
|----|----|----|-----|------|------|-------|------------------------------------------|------------------------------|---------------------------------|----------------------------------------|-------------------------------------|--------------------------------|-----------------------------|---------------------------|-------------------------------|
|    |    |    |     |      |      |       | <i>flavius</i> 1                         | <i>belzebul</i> 0            | <i>jacchus</i> 1                |                                        |                                     |                                |                             |                           |                               |
| 13 | AF | Br | no  | 2013 | 2009 | in    | <i>Sapajus flavius</i> 1                 | <i>Alouatta belzebul</i> 0   | <i>Callithrix jacchus</i> 1     |                                        |                                     |                                |                             |                           |                               |
| 14 | AF | Br | no  | 2013 | 2009 | in    | <i>Sapajus flavius</i> 1                 | <i>Alouatta belzebul</i> 0   | <i>Callithrix jacchus</i> 1     |                                        |                                     |                                |                             |                           |                               |
| 15 | AF | Br | no  | 2012 | 2002 | do/in | <i>Callithrix</i> sp 1                   | <i>Callicebus</i> sp 1       | <i>Cebus</i> sp 1               | <i>Alouatta guariba</i> 1              | <i>Leontopithecus chrysomelas</i> 0 |                                |                             |                           |                               |
| 16 | Am | Pe | no  | 2005 | 2004 | do    | <i>Saguinus fuscicollis leucogenys</i> 1 | <i>Callicebus oenanthe</i> 1 | <i>Cebus albifrons</i> 0        | <i>Ateles belzebuth</i> 0              | <i>Oreonax flavicauda</i> 0         | <i>Sapajus macrocephalus</i> 0 | <i>Alouatta seniculus</i> 0 | <i>Saimiri sciureus</i> 0 |                               |
| 17 | Am | Br | no  | 2017 | 2001 | do    | <i>Alouatta belzebul</i> 1               | <i>Cebus apella</i> 1        | <i>Chiropotes satanas</i> 0     | <i>Saimiri sciureus</i> 0              | <i>Saguinus midas</i> 0             | <i>Cebus kaapori</i> 0         |                             |                           |                               |
| 18 | Am | Co | no  | 2013 | 2008 | do    | <i>Lagothrix lagotricha</i> 1            | <i>Alouatta seniculus</i> 1  | <i>Saimiri sciureus</i> 1       | <i>Callicebus torquatus lugens</i> 1   | <i>Saguinus inustus</i> 1           | <i>Cebus albifrons</i> 1       | <i>Sapajus apella</i> 1     | <i>Aotus</i> sp 1         |                               |
| 19 | Am | Br | no  | 2017 | 2002 | do    | <i>Chiropotes satanas</i> 1              | <i>Cebus apella</i> 1        | <i>Alouatta belzebul</i> 1      | <i>Saimiri sciureus</i> 1              | <i>Saguinus niger</i> 0             | <i>Callicebus moloch</i> 0     |                             |                           |                               |
| 20 | Am | Br | no  | 2017 | 2002 | do    | <i>Chiropotes satanas</i> 1              | <i>Cebus apella</i> 1        | <i>Alouatta belzebul</i> 1      | <i>Aotus infulatus</i> 0               | <i>Saimiri sciureus</i> 0           | <i>Saguinus midas</i> 0        | <i>Cebus kaapori</i> 0      |                           |                               |
| 21 | Am | Br | no  | 2002 | 2000 | do    | <i>Alouatta macconnelli</i> 1            | <i>Saguinus midas</i> 1      | <i>Pithecia chrysocephala</i> 1 | <i>Chiropotes satanas chiropotes</i> 1 | <i>Ateles paniscus</i> 0            | <i>Sapajus apella</i> 0        | <i>Cebus olivaceus</i> 0    |                           |                               |
| 22 | Am | Br | no  | 2002 | 2000 | do    | <i>Alouatta macconnelli</i> 1            | <i>Saguinus midas</i> 0      | <i>Pithecia chrysocephala</i> 0 | <i>Chiropotes satanas chiropotes</i> 0 | <i>Ateles paniscus</i> 0            | <i>Sapajus apella</i> 0        | <i>Cebus olivaceus</i> 0    |                           |                               |
| 23 | Am | Br | yes | 2007 | 2008 | do    | <i>Alouatta macconnelli</i> 1            | <i>Cebus apella</i> 1        | <i>Ateles paniscus</i> 1        | <i>Chiropotes sagulatus</i> 0          | <i>Pithecia pithecia</i> 0          | <i>Saguinus midas</i> 0        | <i>Saimiri sciureus</i> 0   | <i>Cebus olivaceus</i> 0  |                               |
| 24 | Am | Br | yes | 2007 | 2008 | do    | <i>Alouatta macconnelli</i> 1            | <i>Cebus apella</i> 1        | <i>Ateles paniscus</i> 1        | <i>Chiropotes sagulatus</i> 1          | <i>Pithecia pithecia</i> 0          | <i>Saguinus midas</i> 0        | <i>Saimiri sciureus</i> 0   | <i>Cebus olivaceus</i> 0  |                               |
| 25 | Am | Br | yes | 2007 | 2008 | do    | <i>Alouatta macconnelli</i> 1            | <i>Cebus apella</i> 1        | <i>Ateles paniscus</i> 1        | <i>Chiropotes sagulatus</i> 1          | <i>Pithecia pithecia</i> 0          | <i>Saguinus midas</i> 1        | <i>Saimiri sciureus</i> 0   | <i>Cebus olivaceus</i> 0  |                               |
| 26 | Am | Br | yes | 2007 | 2008 | do    | <i>Alouatta macconnelli</i> 1            | <i>Cebus apella</i> 1        | <i>Ateles paniscus</i> 1        | <i>Chiropotes sagulatus</i> 1          | <i>Pithecia pithecia</i> 1          | <i>Saguinus midas</i> 1        | <i>Saimiri sciureus</i> 0   | <i>Cebus olivaceus</i> 0  |                               |
| 27 | Am | Br | yes | 2007 | 2008 | do    | <i>Alouatta macconnelli</i> 1            | <i>Cebus apella</i> 1        | <i>Ateles paniscus</i> 1        | <i>Chiropotes sagulatus</i> 1          | <i>Pithecia pithecia</i> 1          | <i>Saguinus midas</i> 0        | <i>Saimiri sciureus</i> 0   | <i>Cebus olivaceus</i> 0  |                               |
| 28 | Am | Br | yes | 2013 | 2009 | do    | <i>Sapajus apella</i> 1                  | <i>Saguinus weddelli</i> 1   | <i>Aotus nigriceps</i> 1        | <i>Callicebus cf. moloch</i> 1         | <i>Pithecia irrorata</i> 1          | <i>Alouatta puruensis</i> 1    | <i>Ateles chamek</i> 1      | <i>Saimiri ustus</i> 1    | <i>Chiropotes albinasus</i> 1 |

|    |    |    |     |      |      |       |                                       |                             |                                    |                               |                               |                            |                               |                            |                                        |
|----|----|----|-----|------|------|-------|---------------------------------------|-----------------------------|------------------------------------|-------------------------------|-------------------------------|----------------------------|-------------------------------|----------------------------|----------------------------------------|
| 29 | Am | Br | no  | 2010 | 2007 | do    | <i>Cebus apella</i> 0                 | <i>Mico argentatus</i> 0    | <i>Saguinus niger</i> 0            | <i>Saimiri sciureus</i> 0     | <i>Aotus azarae</i> 0         | <i>Callicebus moloch</i> 0 | <i>Chiropotes albinasus</i> 0 | <i>Alouatta belzebul</i> 1 | <i>Ateles marginatus</i> 0             |
| 30 | Am | Br | no  | 2010 | 2009 | do    | <i>Cebus kaapori</i> 1                | <i>Alouatta belzebul</i> 1  | <i>Saimiri sciureus</i> 1          | <i>Sapajus apella</i> 1       | <i>Chiropotes satanas</i> 0   | <i>Saguinus midas</i> 0    |                               |                            |                                        |
| 31 | Am | Br | no  | 2015 | NI   | do    | <i>Alouatta belzebul</i> 1            | <i>Ateles marginatus</i> 0  | <i>Callicebus moloch</i> 0         | <i>Cebus apella</i> 1         | <i>Chiropotes albinasus</i> 0 | <i>Mico argentatus</i> 1   | <i>Saimiri sciureus</i> 0     |                            |                                        |
| 32 | Am | Br | no  | 2016 | NI   | do    | <i>Alouatta belzebul</i> 1            | <i>Ateles marginatus</i> 1  | <i>Callicebus moloch</i> 1         | <i>Cebus apella</i> 1         | <i>Chiropotes albinasus</i> 1 | <i>Mico argentatus</i> 1   | <i>Saimiri sciureus</i> 1     |                            |                                        |
| 33 | Am | Br | no  | 2012 | NI   | do    | <i>Alouatta belzebul</i> 1            | <i>Ateles marginatus</i> 1  | <i>Callicebus moloch</i> 1         | <i>Cebus apella</i> 1         | <i>Chiropotes albinasus</i> 1 | <i>Mico argentatus</i> 1   | <i>Saimiri sciureus</i> 1     |                            |                                        |
| 34 | Am | Br | no  | 2012 | NI   | do    | <i>Alouatta belzebul</i> 1            | <i>Ateles marginatus</i> 0  | <i>Callicebus moloch</i> 1         | <i>Cebus apella</i> 1         | <i>Chiropotes albinasus</i> 1 | <i>Mico argentatus</i> 1   | <i>Saimiri sciureus</i> 1     |                            |                                        |
| 35 | Am | Br | yes | 2008 | 2008 | do/in | <i>Ateles chamek</i> 1                | <i>Alouatta seniculus</i> 1 | <i>Cebus apella</i> 1              | <i>Chiropotes albinasus</i> 1 | <i>Callicebus sp</i> 1        | <i>Pithecia irrorata</i> 1 | <i>Saimiri ustus</i> 1        | <i>Aotus nigriceps</i> 1   | <i>Saguinus fuscicollis weddelli</i> 1 |
| 36 | Ca | Co | no  | 2007 | 2005 | do    | <i>Alouatta seniculus</i> 1           | <i>Saguinus oedipus</i> 1   | <i>Cebus capucinus</i> 0           |                               |                               |                            |                               |                            |                                        |
| 37 | Ca | Co | no  | 2004 | 2005 | do    | <i>Alouatta seniculus</i> 1           | <i>Saguinus oedipus</i> 1   | <i>Cebus capucinus</i> 1           | <i>Alouatta palliata</i> 0    |                               |                            |                               |                            |                                        |
| 38 | Ca | Co | no  | 2011 | 2010 | do    | <i>Alouatta seniculus seniculus</i> 1 | <i>Saguinus oedipus</i> 1   | <i>Cebus capucinus capucinus</i> 1 | <i>Alouatta palliata</i> 0    | <i>Ateles fusciceps</i> 0     |                            |                               |                            |                                        |
| 39 | Ca | Co | no  | 2011 | 2010 | do    | <i>Alouatta seniculus seniculus</i> 1 | <i>Saguinus oedipus</i> 1   | <i>Cebus capucinus capucinus</i> 1 | <i>Alouatta palliata</i> 0    | <i>Ateles fusciceps</i> 0     |                            |                               |                            |                                        |
| 40 | Ca | Co | no  | 2012 | 2010 | do    | <i>Alouatta seniculus</i> 1           | <i>Saguinus oedipus</i> 1   | <i>Ateles geoffroyi</i> 0          | <i>Cebus capucinus</i> 0      | <i>Alouatta palliata</i> 0    |                            |                               |                            |                                        |
| 41 | Ca | Co | no  | 2011 | 2010 | do    | <i>Alouatta seniculus</i> 1           | <i>Saguinus oedipus</i> 0   | <i>Ateles geoffroyi</i> 0          | <i>Cebus capucinus</i> 0      | <i>Alouatta palliata</i> 0    |                            |                               |                            |                                        |
| 42 | Ca | Co | no  | 2011 | 2010 | do    | <i>Alouatta seniculus</i> 1           | <i>Saguinus oedipus</i> 0   | <i>Ateles geoffroyi</i> 0          | <i>Cebus capucinus</i> 0      | <i>Alouatta palliata</i> 0    |                            |                               |                            |                                        |
| 43 | Ca | Co | no  | 2011 | 2010 | do    | <i>Alouatta seniculus</i> 1           | <i>Saguinus oedipus</i> 1   | <i>Ateles geoffroyi</i> 0          | <i>Cebus capucinus</i> 0      | <i>Alouatta palliata</i> 0    |                            |                               |                            |                                        |
| 44 | Ca | Co | no  | 2011 | 2010 | do    | <i>Alouatta seniculus</i> 1           | <i>Saguinus oedipus</i> 0   | <i>Ateles geoffroyi</i> 0          | <i>Cebus capucinus</i> 0      | <i>Alouatta palliata</i> 0    |                            |                               |                            |                                        |
| 45 | Ca | Co | no  | 2011 | 2010 | do    | <i>Alouatta seniculus</i> 1           | <i>Saguinus oedipus</i> 1   | <i>Ateles geoffroyi</i> 0          | <i>Cebus capucinus</i> 0      | <i>Alouatta palliata</i> 0    |                            |                               |                            |                                        |
| 46 | Ce | Br | yes | 2003 | 1992 | do    | <i>Callicebus personatus</i> 1        | <i>Alouatta caraya</i> 1    | <i>Callithrix penicillata</i> 1    | <i>Sapajus nigratus</i> 0     |                               |                            |                               |                            |                                        |
| 47 | Ce | Br | yes | 2009 | 2009 | do    | <i>Alouatta</i>                       | <i>Sapajus</i>              | <i>Callithrix</i>                  |                               |                               |                            |                               |                            |                                        |

|    |    |    |     |      |      |    |                                 |                                     |                                  |                                   |                                  |                              |                        |                        |
|----|----|----|-----|------|------|----|---------------------------------|-------------------------------------|----------------------------------|-----------------------------------|----------------------------------|------------------------------|------------------------|------------------------|
|    |    |    |     |      |      |    | <i>caraya</i> 1                 | <i>libidinosus</i> 1                | <i>penicillata</i> 0             |                                   |                                  |                              |                        |                        |
| 48 | Ce | Br | no  | 2002 | 1998 | do | <i>Callithrix penicillata</i> 1 | <i>Cebus apella</i> 1               | <i>Alouatta caraya</i> 0         | <i>Callicebus nigrifrons</i> 0    |                                  |                              |                        |                        |
| 49 | Ce | Br | yes | 2002 | 2002 | do | <i>Callithrix geoffroyi</i> 1   | <i>Alouatta caraya</i> 1            | <i>Callicebus nigrifrons</i> 0   | <i>Callithrix penicillata</i> 0   |                                  |                              |                        |                        |
| 50 | Ce | Br | no  | 2015 | 2015 | do | <i>Callithrix penicillata</i> 1 | <i>Sapajus libidinosus</i> 0        | <i>Alouatta caraya</i> 0         | <i>Callicebus nigrifrons</i> 0    |                                  |                              |                        |                        |
| 51 | Ce | Br | yes | 2012 | NI   | do | <i>Cebus apella nigrinus</i> 1  | <i>Callithrix penicillata</i> 1     | <i>Alouatta caraya</i> 0         | <i>Callicebus nigrifrons</i> 0    |                                  |                              |                        |                        |
| 52 | Ce | Br | no  | 2007 | 2000 | do | <i>Callithrix aurita</i> 0      | <i>Callicebus personatus</i> 0      | <i>Cebus apella</i> 1            | <i>Alouatta guariba</i> 1         | <i>Brachyteles arachnoides</i> 0 |                              |                        |                        |
| 53 | Ce | Br | no  | 2007 | 2000 | do | <i>Callithrix aurita</i> 1      | <i>Callicebus personatus</i> 1      | <i>Cebus apella</i> 1            | <i>Alouatta guariba</i> 1         | <i>Brachyteles arachnoides</i> 1 |                              |                        |                        |
| 54 | Ce | Br | no  | 2007 | 2000 | do | <i>Callithrix aurita</i> 0      | <i>Callicebus personatus</i> 1      | <i>Cebus apella</i> 1            | <i>Alouatta guariba</i> 1         | <i>Brachyteles arachnoides</i> 1 |                              |                        |                        |
| 55 | Ch | Bo | yes | 2006 | 2005 | do | <i>Callithrix melanura</i> 1    | <i>Cebus libidinosus juruanus</i> 1 | <i>Callicebus donacophilus</i> 1 | <i>Aotus azarae boliviensis</i> 0 | <i>Alouatta caraya</i> 0         | <i>Saimiri boliviensis</i> 0 | <i>Alouatta sara</i> 0 | <i>Ateles chamek</i> 0 |
| 56 | Ch | Bo | yes | 2006 | 2005 | do | <i>Callithrix melanura</i> 1    | <i>Cebus libidinosus juruanus</i> 1 | <i>Callicebus donacophilus</i> 1 | <i>Aotus azarae boliviensis</i> 0 | <i>Alouatta caraya</i> 0         | <i>Saimiri boliviensis</i> 0 | <i>Alouatta sara</i> 0 | <i>Ateles chamek</i> 0 |
| 57 | Ch | Bo | no  | 2006 | 2005 | do | <i>Callithrix melanura</i> 1    | <i>Cebus libidinosus juruanus</i> 1 | <i>Callicebus donacophilus</i> 1 | <i>Aotus azarae boliviensis</i> 1 | <i>Alouatta caraya</i> 1         | <i>Saimiri boliviensis</i> 0 | <i>Alouatta sara</i> 0 | <i>Ateles chamek</i> 0 |
| 58 | Ch | Bo | no  | 2010 | 2005 | do | <i>Callithrix melanura</i> 0    | <i>Cebus libidinosus juruanus</i> 0 | <i>Callicebus donacophilus</i> 1 | <i>Aotus azarae boliviensis</i> 0 | <i>Alouatta caraya</i> 0         | <i>Saimiri boliviensis</i> 0 | <i>Alouatta sara</i> 0 | <i>Ateles chamek</i> 0 |
| 59 | Ch | Bo | no  | 2010 | 2005 | do | <i>Callithrix melanura</i> 0    | <i>Cebus libidinosus juruanus</i> 1 | <i>Callicebus donacophilus</i> 1 | <i>Aotus azarae boliviensis</i> 1 | <i>Alouatta caraya</i> 0         | <i>Saimiri boliviensis</i> 0 | <i>Alouatta sara</i> 0 | <i>Ateles chamek</i> 0 |
| 60 | Ch | Bo | no  | 2010 | 2005 | do | <i>Callithrix melanura</i> 0    | <i>Cebus libidinosus juruanus</i> 1 | <i>Callicebus donacophilus</i> 1 | <i>Aotus azarae boliviensis</i>   | <i>Alouatta caraya</i> 0         | <i>Saimiri boliviensis</i> 0 | <i>Alouatta sara</i> 0 | <i>Ateles chamek</i> 0 |

|    |    |    |     |      |      |    |                                     |                                       |                                  |                                   |                          |                              |                        |                        |
|----|----|----|-----|------|------|----|-------------------------------------|---------------------------------------|----------------------------------|-----------------------------------|--------------------------|------------------------------|------------------------|------------------------|
|    |    |    |     |      |      |    |                                     |                                       |                                  | 0                                 |                          |                              |                        |                        |
| 61 | Ch | Bo | no  | 2012 | 2005 | do | <i>Callithrix melanura</i> 1        | <i>Cebus libidinosus juruanus</i> 1   | <i>Callicebus donacophilus</i> 0 | <i>Aotus azarae boliviensis</i> 0 | <i>Alouatta caraya</i> 0 | <i>Saimiri boliviensis</i> 0 | <i>Alouatta sara</i> 0 | <i>Ateles chamek</i> 0 |
| 62 | Ch | Bo | no  | 2010 | 2005 | do | <i>Callithrix melanura</i> 1        | <i>Cebus libidinosus juruanus</i> 1   | <i>Callicebus donacophilus</i> 0 | <i>Aotus azarae boliviensis</i> 0 | <i>Alouatta caraya</i> 0 | <i>Saimiri boliviensis</i> 0 | <i>Alouatta sara</i> 0 | <i>Ateles chamek</i> 0 |
| 63 | Ch | Bo | no  | 2010 | 2005 | do | <i>Callithrix melanura</i> 1        | <i>Cebus libidinosus juruanus</i> 1   | <i>Callicebus donacophilus</i> 1 | <i>Aotus azarae boliviensis</i> 0 | <i>Alouatta caraya</i> 0 | <i>Saimiri boliviensis</i> 0 | <i>Alouatta sara</i> 0 | <i>Ateles chamek</i> 0 |
| 64 | Me | Mx | no  | 2006 | 2003 | do | <i>Alouatta palliata mexicana</i> 1 | <i>Ateles geoffroyi vellerosus</i> 1  |                                  |                                   |                          |                              |                        |                        |
| 65 | Me | CR | yes | 2011 | 2005 | do | <i>Ateles geoffroyi</i> 1           | <i>Alouatta palliata</i> 1            | <i>Cebus capucinus</i> 1         |                                   |                          |                              |                        |                        |
| 66 | Me | Mx | no  | 2017 | 2010 | do | <i>Alouatta pigra</i> 1             | <i>Ateles geoffroyi</i> 1             |                                  |                                   |                          |                              |                        |                        |
| 67 | Me | Mx | no  | 2012 | 2002 | do | <i>Ateles geoffroyi</i> 1           | <i>Alouatta pigra</i> 1               |                                  |                                   |                          |                              |                        |                        |
| 68 | Me | Mx | no  | 2004 | 2002 | do | <i>Alouatta pigra</i> 0             | <i>Ateles geoffroyi yucateensis</i> 1 |                                  |                                   |                          |                              |                        |                        |
| 69 | Me | Mx | no  | 2009 | 2002 | do | <i>Alouatta pigra</i> 1             | <i>Ateles geoffroyi yucateensis</i> 1 |                                  |                                   |                          |                              |                        |                        |
| 70 | Me | Mx | no  | 2011 | 2002 | do | <i>Alouatta pigra</i> 1             | <i>Ateles geoffroyi yucateensis</i> 1 |                                  |                                   |                          |                              |                        |                        |
| 71 | Me | Mx | no  | 2011 | 2002 | do | <i>Alouatta pigra</i> 1             | <i>Ateles geoffroyi yucateensis</i> 0 |                                  |                                   |                          |                              |                        |                        |
| 72 | Me | Mx | no  | 2011 | 2002 | do | <i>Alouatta pigra</i> 0             | <i>Ateles geoffroyi yucateensis</i> 1 |                                  |                                   |                          |                              |                        |                        |
| 73 | Me | Mx | no  | 2005 | 1995 | do | <i>Alouatta palliata</i> 1          | <i>Ateles geoffroyi</i> 0             |                                  |                                   |                          |                              |                        |                        |
| 74 | Me | Mx | yes | 2012 | 2010 | do | <i>Ateles geoffroyi</i> 1           | <i>Alouatta pigra</i> 1               |                                  |                                   |                          |                              |                        |                        |



|    |     |    |     |      |      |    |                             |                             |                                    |                             |                          |                           |                           |
|----|-----|----|-----|------|------|----|-----------------------------|-----------------------------|------------------------------------|-----------------------------|--------------------------|---------------------------|---------------------------|
| 75 | Me  | Be | no  | 2012 | 2007 | do | <i>Ateles geoffroyi</i> 0   | <i>Alouatta pigra</i> 1     |                                    |                             |                          |                           |                           |
| 76 | Me  | CR | yes | 2005 | 2005 | do | <i>Alouatta palliata</i> 1  | <i>Ateles geoffroyi</i> 1   | <i>Cebus capucinus</i> 0           |                             |                          |                           |                           |
| 77 | Me  | Mx | no  | 2003 | 2004 | do | <i>Alouatta palliata</i> 1  | <i>Ateles geoffroyi</i> 0   |                                    |                             |                          |                           |                           |
| 78 | Me  | Pa | yes | 2017 | 2000 | do | <i>Cebus capucinus</i> 1    | <i>Saguinus geoffroyi</i> 1 | <i>Ateles geoffroyi</i> 0          | <i>Alouatta palliata</i> 1  |                          |                           |                           |
| 79 | Or  | Co | no  | 2014 | 2011 | do | <i>Alouatta seniculus</i> 1 | <i>Sapajus apella</i> 1     | <i>Saimiri sciureus albigena</i> 1 | <i>Callicebus ornatus</i> 1 | <i>Aotus brumbacki</i> 1 | <i>Lagothrix lugens</i> 0 | <i>Ateles belzebuth</i> 0 |
| 80 | Or  | Co | no  | 2014 | 2011 | do | <i>Alouatta seniculus</i> 1 | <i>Sapajus apella</i> 1     | <i>Saimiri sciureus albigena</i> 1 | <i>Callicebus ornatus</i> 1 | <i>Aotus brumbacki</i> 1 | <i>Lagothrix lugens</i> 0 | <i>Ateles belzebuth</i> 0 |
| 81 | Or  | Co | no  | 2014 | 2011 | do | <i>Alouatta seniculus</i> 1 | <i>Sapajus apella</i> 1     | <i>Saimiri sciureus albigena</i> 1 | <i>Callicebus ornatus</i> 0 | <i>Aotus brumbacki</i> 1 | <i>Lagothrix lugens</i> 0 | <i>Ateles belzebuth</i> 0 |
| 82 | Or  | Co | no  | 2014 | 2011 | do | <i>Alouatta seniculus</i> 1 | <i>Sapajus apella</i> 1     | <i>Saimiri sciureus albigena</i> 1 | <i>Callicebus ornatus</i> 0 | <i>Aotus brumbacki</i> 0 | <i>Lagothrix lugens</i> 0 | <i>Ateles belzebuth</i> 0 |
| 83 | Or  | Co | no  | 2014 | 2011 | do | <i>Alouatta seniculus</i> 1 | <i>Sapajus apella</i> 1     | <i>Saimiri sciureus albigena</i> 1 | <i>Callicebus ornatus</i> 0 | <i>Aotus brumbacki</i> 0 | <i>Lagothrix lugens</i> 0 | <i>Ateles belzebuth</i> 0 |
| 84 | Or  | Co | no  | 2014 | 2011 | do | <i>Alouatta seniculus</i> 1 | <i>Sapajus apella</i> 1     | <i>Saimiri sciureus albigena</i> 1 | <i>Callicebus ornatus</i> 1 | <i>Aotus brumbacki</i> 1 | <i>Lagothrix lugens</i> 0 | <i>Ateles belzebuth</i> 0 |
| 85 | Or  | Co | no  | 2014 | 2011 | do | <i>Alouatta seniculus</i> 1 | <i>Sapajus apella</i> 1     | <i>Saimiri sciureus albigena</i> 0 | <i>Callicebus ornatus</i> 1 | <i>Aotus brumbacki</i> 1 | <i>Lagothrix lugens</i> 0 | <i>Ateles belzebuth</i> 0 |
| 86 | Or  | Co | no  | 2014 | 2011 | do | <i>Alouatta seniculus</i> 1 | <i>Sapajus apella</i> 1     | <i>Saimiri sciureus albigena</i> 1 | <i>Callicebus ornatus</i> 1 | <i>Aotus brumbacki</i> 1 | <i>Lagothrix lugens</i> 0 | <i>Ateles belzebuth</i> 0 |
| 87 | Or  | Co | no  | 2014 | 2011 | do | <i>Alouatta seniculus</i> 1 | <i>Sapajus apella</i> 1     | <i>Saimiri sciureus albigena</i> 1 | <i>Callicebus ornatus</i> 1 | <i>Aotus brumbacki</i> 1 | <i>Lagothrix lugens</i> 0 | <i>Ateles belzebuth</i> 0 |
| 88 | Or  | Co | no  | 2014 | 2011 | do | <i>Alouatta seniculus</i> 1 | <i>Sapajus apella</i> 1     | <i>Saimiri sciureus albigena</i> 1 | <i>Callicebus ornatus</i> 0 | <i>Aotus brumbacki</i> 0 | <i>Lagothrix lugens</i> 0 | <i>Ateles belzebuth</i> 0 |
| 89 | TCM | Co | no  | 2017 | 2010 | do | <i>Alouatta seniculus</i> 1 | <i>Cebus capucinus</i> 1    | <i>Saguinus oedipus</i> 1          | <i>Ateles fusciceps</i> 0   |                          |                           |                           |
| 90 | TCM | Co | no  | 2013 | 2008 | do | <i>Saguinus leucopus</i> 0  | <i>Alouatta seniculus</i> 1 | <i>Ateles hybridus</i> 0           | <i>Cebus albifrons</i> 0    |                          |                           |                           |
| 91 | TCM | Co | no  | 2013 | 2008 | do | <i>Saguinus leucopus</i> 1  | <i>Alouatta seniculus</i> 0 | <i>Ateles hybridus</i> 0           | <i>Cebus albifrons</i> 0    |                          |                           |                           |
| 92 | TCM | Co | no  | 2007 | 2008 | do | <i>Saguinus leucopus</i> 1  | <i>Alouatta seniculus</i> 1 | <i>Ateles hybridus</i> 0           | <i>Cebus albifrons</i> 0    |                          |                           |                           |

|    |     |    |     |      |      |    |                             |                             |                          |                           |                             |
|----|-----|----|-----|------|------|----|-----------------------------|-----------------------------|--------------------------|---------------------------|-----------------------------|
| 93 | TCM | Co | no  | 2013 | 2008 | do | <i>Saguinus leucopus</i> 1  | <i>Alouatta seniculus</i> 0 | <i>Ateles hybridus</i> 0 | <i>Cebus albifrons</i> 0  |                             |
| 94 | TCM | Co | no  | 2017 | 2008 | do | <i>Ateles hybridus</i> 1    | <i>Alouatta seniculus</i> 1 | <i>Cebus albifrons</i> 1 | <i>Aotus</i> sp 1         |                             |
| 95 | TCM | Co | no  | 2017 | 2010 | do | <i>Saguinus leucopus</i> 1  | <i>Ateles hybridus</i> 0    | <i>Cebus albifrons</i> 0 | <i>Lagothrix lugens</i> 0 | <i>Alouatta seniculus</i> 0 |
| 96 | TCM | Co | no  | 2017 | 2010 | do | <i>Saguinus leucopus</i> 1  | <i>Ateles hybridus</i> 0    | <i>Cebus albifrons</i> 0 | <i>Lagothrix lugens</i> 0 | <i>Alouatta seniculus</i> 0 |
| 97 | TCM | Co | yes | 2007 | 2006 | do | <i>Alouatta seniculus</i> 1 | <i>Cebus</i> spp 1          | <i>Ateles hybridus</i> 1 |                           |                             |

**Table S2.** Proportion of reproductive parts, vegetative parts and preys in the diet of each ecospecies. Information from Hawes and Peres (2014).

| Cod | Ecospecies                         | Species                                                                                                                  | Reproductive parts (%) | Vegetative parts (%) | Prey (%) |
|-----|------------------------------------|--------------------------------------------------------------------------------------------------------------------------|------------------------|----------------------|----------|
| Cj* | uakaries                           | <i>Cacajao</i> spp.                                                                                                      | 93                     | 3                    | 2        |
| Ct  | collared titi monkeys              | <i>C. torquatus</i> , <i>Callicebus</i> spp.                                                                             | 90                     | 7                    | 3        |
| Pi  | saki monkeys                       | <i>Pithecia</i> spp.                                                                                                     | 89                     | 9                    | 1        |
| Ch  | bearded saki monkeys               | <i>Chiropotes</i> spp.                                                                                                   | 93                     | 1                    | 3        |
| Cf  | white-fronted capuchins            | <i>Cebus albifrons</i> , <i>C. capucinus</i>                                                                             | 82                     | 1                    | 17       |
| Cp  | Atlantic forest dusky titi monkeys | <i>C. personatus</i> , <i>Callicebus</i> spp.                                                                            | 81                     | 16                   | 0        |
| At  | spider monkeys                     | <i>Ateles</i> spp.                                                                                                       | 83                     | 12                   | 0        |
| Ao  | owl monkeys                        | <i>Aotus</i> spp.                                                                                                        | 91                     | 3                    | 6        |
| Le  | lion tamarins                      | <i>Leontopithecus</i> spp.                                                                                               | 87                     | 0                    | 9        |
| La  | woolly monkeys                     | <i>Lagothrix</i> spp., <i>Oreonax flavicauda</i>                                                                         | 76                     | 13                   | 9        |
| Sx* | moustached tamarins                | <i>S. mystax</i> , <i>S. labiatus</i> , <i>S. imperator</i>                                                              | 75                     | 0                    | 15       |
| Sm  | midas tamarins                     | <i>S. midas</i> , <i>S. niger</i>                                                                                        | 67                     | 0                    | 30       |
| So  | bare-faced tamarins                | <i>S. bicolor</i> , <i>S. geoffroyi</i> , <i>S. leucopus</i> , <i>S. martinsi</i> , <i>S. oedipus</i>                    | 63                     | 1                    | 25       |
| Co  | wedge-capped capuchins             | <i>C. kaapori</i> , <i>C. olivaceus</i>                                                                                  | 61                     | 6                    | 33       |
| Sf  | saddle-back tamarins               | <i>Saguinus fuscicollis</i> , <i>S. inustus</i> , <i>S. melanoleucus</i> , <i>S. nigricollis</i> , <i>S. tripartitus</i> | 58                     | 0                    | 29       |
| Cm  | Amazonian dusky titi monkeys       | <i>Callicebus moloch</i> , <i>Callicebus</i> spp.                                                                        | 57                     | 34                   | 8        |
| Ca  | brown capuchins                    | <i>C. apella</i> , <i>Cebus</i> spp.                                                                                     | 52                     | 16                   | 30       |
| Br  | woolly spider monkeys              | <i>Brachyteles</i> spp.                                                                                                  | 52                     | 46                   | 0        |
| Sa  | squirrel monkeys                   | <i>Saimiri</i> spp.                                                                                                      | 42                     | 0                    | 58       |
| Al  | howler monkeys                     | <i>Alouatta</i> spp.                                                                                                     | 43                     | 54                   | 0        |
| Cg* | Goeldi's monkeys                   | <i>Callimico goeldii</i>                                                                                                 | 29                     | 0                    | 13       |
| Mi  | Amazonian marmosets                | <i>Mico</i> spp.                                                                                                         | 19                     | 0                    | 19       |
| Cx  | Atlantic forest marmosets          | <i>Callithrix</i> spp.                                                                                                   | 18                     | 0                    | 22       |
| Cb* | pygmy marmosets                    | <i>Cebuella pygmaea</i> , <i>Callibella humilis</i>                                                                      | 0                      | 0                    | 23       |

\*Ecospecies absents in the analysis.

**Table S3.** List of 97 fragments used in the analysis and their geographic coordinates in decimal degrees. Sub-regions: Amazonia (Am), Caribbean (Ca), Cerrado (Ce), Atlantic Forest (AF), Mesoamerica (Me), Orinoco (Or), Chaco (Ch), Tumbes-Chocó-Magdalena (TCM).

| Fragment | Latitude     | Longitude    | Country  | Sub-region | References |
|----------|--------------|--------------|----------|------------|------------|
| 1        | -22.80855376 | -46.99288454 | Brazil   | AF         | 1          |
| 2        | -22.77891695 | -47.00155041 | Brazil   | AF         | 1          |
| 3        | -21.193466   | -43.699189   | Brazil   | AF         | 2          |
| 4        | -23.753629   | -53.13647    | Brazil   | AF         | 3          |
| 5        | -20.687425   | -42.8733     | Brazil   | AF         | 4          |
| 6        | -6.566738    | -35.131221   | Brazil   | AF         | 5          |
| 7        | -13.952823   | -39.451174   | Brazil   | AF         | 6          |
| 8        | -15.926917   | -39.635883   | Brazil   | AF         | 6          |
| 9        | -21.36861111 | -46.27888889 | Brazil   | AF         | 7          |
| 10       | -22.89472222 | -46.32361111 | Brazil   | AF         | 7          |
| 11       | -21.42333618 | -46.09480468 | Brazil   | AF         | 8          |
| 12       | -6.758444444 | -35.10827778 | Brazil   | AF         | 9          |
| 13       | -8.525270448 | -35.05341867 | Brazil   | AF         | 9          |
| 14       | -9.757241667 | -36.240175   | Brazil   | AF         | 9          |
| 15       | -16.042222   | -40.058889   | Brazil   | AF         | 10         |
| 16       | -6.025528    | -76.992694   | Peru     | Am         | 11         |
| 17       | -4.30787     | -49.494389   | Brazil   | Am         | 12         |
| 18       | 2.372988     | -72.640968   | Colombia | Am         | 13         |
| 19       | -3.869943    | -49.642028   | Brazil   | Am         | 14         |
| 20       | -4.273274    | -49.504488   | Brazil   | Am         | 15         |
| 21       | -2.342269    | -60.095024   | Brazil   | Am         | 16         |
| 22       | -2.404463    | -59.871321   | Brazil   | Am         | 16         |
| 23       | -1.783361111 | -59.68769444 | Brazil   | Am         | 17         |
| 24       | -1.831416667 | -59.68719444 | Brazil   | Am         | 17         |
| 25       | -1.739361111 | -59.44230556 | Brazil   | Am         | 17         |
| 26       | -1.741694444 | -59.70322222 | Brazil   | Am         | 17         |
| 27       | -1.592694444 | -59.62730556 | Brazil   | Am         | 17         |
| 28       | -11.488094   | -61.438953   | Brazil   | Am         | 18         |
| 29       | -3.403467    | -51.7363     | Brazil   | Am         | 19         |
| 30       | -4.141411    | -49.511967   | Brazil   | Am         | 20         |
| 31       | -2.94698215  | -54.80584365 | Brazil   | Am         | 21         |
| 32       | -3.365571073 | -54.87861993 | Brazil   | Am         | 21         |

|    |              |              |            |    |    |
|----|--------------|--------------|------------|----|----|
| 33 | -4.059984246 | -54.91029614 | Brazil     | Am | 21 |
| 34 | -3.95        | -54.86805556 | Brazil     | Am | 21 |
| 35 | -11.715918   | -61.486929   | Brazil     | Am | 22 |
| 36 | 10.04        | -74.974944   | Colombia   | Ca | 23 |
| 37 | 10.635422    | -75.246621   | Colombia   | Ca | 24 |
| 38 | 9.459337     | -75.361197   | Colombia   | Ca | 25 |
| 39 | 9.473889     | -75.348889   | Colombia   | Ca | 25 |
| 40 | 9.587543181  | -75.33680657 | Colombia   | Ca | 26 |
| 41 | 9.498810544  | -75.38619036 | Colombia   | Ca | 26 |
| 42 | 9.576150463  | -75.46742552 | Colombia   | Ca | 26 |
| 43 | 9.435677532  | -75.37333609 | Colombia   | Ca | 26 |
| 44 | 9.426915127  | -75.45255531 | Colombia   | Ca | 26 |
| 45 | 9.940501976  | -75.10090395 | Colombia   | Ca | 26 |
| 46 | -21.580303   | -47.807235   | Brazil     | Ce | 27 |
| 47 | -20.392896   | -54.587635   | Brazil     | Ce | 28 |
| 48 | -21.11421    | -47.66381    | Brazil     | Ce | 29 |
| 49 | -19.257778   | -43.516944   | Brazil     | Ce | 30 |
| 50 | -18.925748   | -48.154949   | Brazil     | Ce | 31 |
| 51 | -21.218923   | -47.846245   | Brazil     | Ce | 32 |
| 52 | -22.633639   | -48.289997   | Brazil     | Ce | 33 |
| 53 | -22.665924   | -48.192556   | Brazil     | Ce | 33 |
| 54 | -22.694422   | -48.084542   | Brazil     | Ce | 33 |
| 55 | -17.92374794 | -63.16547971 | Bolivia    | Ch | 34 |
| 56 | -17.92697204 | -63.14819431 | Bolivia    | Ch | 34 |
| 57 | -17.78021498 | -63.06639822 | Bolivia    | Ch | 34 |
| 58 | -17.81188633 | -62.95304426 | Bolivia    | Ch | 34 |
| 59 | -17.82122383 | -62.95192874 | Bolivia    | Ch | 34 |
| 60 | -17.84435341 | -62.92806677 | Bolivia    | Ch | 34 |
| 61 | -17.91027807 | -62.93607955 | Bolivia    | Ch | 34 |
| 62 | -17.89008947 | -62.91511188 | Bolivia    | Ch | 34 |
| 63 | -17.88716937 | -62.90817504 | Bolivia    | Ch | 34 |
| 64 | 18.37934037  | -94.76922254 | Mexico     | Me | 35 |
| 65 | 10.467944    | -83.954119   | Costa Rica | Me | 36 |
| 66 | 16.181003    | -90.874028   | Mexico     | Me | 37 |
| 67 | 18.273611    | -90.731944   | Mexico     | Me | 38 |
| 68 | 18.46666667  | -91.18333333 | Mexico     | Me | 39 |
| 69 | 18.15        | -91.61666667 | Mexico     | Me | 39 |

|    |             |              |            |     |    |
|----|-------------|--------------|------------|-----|----|
| 70 | 18.58333333 | -88.45       | Mexico     | Me  | 39 |
| 71 | 17.93333333 | -88.86666667 | Mexico     | Me  | 39 |
| 72 | 21.23333333 | -88.55       | Mexico     | Me  | 39 |
| 73 | 18.686792   | -95.188451   | Mexico     | Me  | 40 |
| 74 | 17.305222   | -88.446236   | Belize     | Me  | 41 |
| 75 | 16.370667   | -88.494479   | Belize     | Me  | 41 |
| 76 | 10.411715   | -84.114233   | Costa Rica | Me  | 42 |
| 77 | 17.79458    | -93.109908   | Mexico     | Me  | 43 |
| 78 | 9.154959    | -79.843718   | Panama     | Me  | 44 |
| 79 | 3.608744    | -73.638841   | Colombia   | Or  | 45 |
| 80 | 3.616664    | -73.646057   | Colombia   | Or  | 45 |
| 81 | 3.61726     | -73.641334   | Colombia   | Or  | 45 |
| 82 | 3.59999     | -73.625466   | Colombia   | Or  | 45 |
| 83 | 3.593552    | -73.633222   | Colombia   | Or  | 45 |
| 84 | 3.594236    | -73.624502   | Colombia   | Or  | 45 |
| 85 | 3.599476    | -73.64619    | Colombia   | Or  | 45 |
| 86 | 3.578006    | -73.444488   | Colombia   | Or  | 45 |
| 87 | 3.565448    | -73.448329   | Colombia   | Or  | 45 |
| 88 | 3.561927    | -73.475485   | Colombia   | Or  | 45 |
| 89 | 7.943641    | -76.251857   | Colombia   | TCM | 46 |
| 90 | 5.67503     | -74.7744     | Colombia   | TCM | 47 |
| 91 | 5.641332    | -74.836359   | Colombia   | TCM | 47 |
| 92 | 5.57532     | -74.95763    | Colombia   | TCM | 47 |
| 93 | 5.33933     | -74.73547    | Colombia   | TCM | 47 |
| 94 | 6.712071    | -74.14557    | Colombia   | TCM | 48 |
| 95 | 6.897457    | -74.578329   | Colombia   | TCM | 49 |
| 96 | 6.907453    | -74.572368   | Colombia   | TCM | 49 |
| 97 | 6.048338    | -74.265375   | Colombia   | TCM | 50 |

## References

1. Lima, E.F. Levantamento e censo de primatas em fragmentos florestais de mata atlântica na região de Sousas e Joaquim Egídio, Campinas, SP. Undergraduate Dissertation, Universidade Estadual Paulista “Júlio de Mesquita Filho”, Brazil. 2008.
2. Galego, J.S.; Nunes, P.S.O.; Ferreira, R.S.; Cerqueira, R.C.; Costa, F.M. Mamíferos de médio e grande porte da Reserva Biológica de Pinheiro Grosso. In *V Simpósio de Pesquisa e Inovação / IV Seminário de Iniciação Científica do IF Sudeste MG*, 2014.
3. Oliveira, L.P.; Aguiar, D.; Margatido, T.C.C.; Pachaly, J.R. Caracterização faunística de mamíferos de médio e grande porte de um fragmento florestal do noroeste do estado do Paraná, Brasil. *Arq. Ciênc. Vet. Zool.* **2012**, *15*, 109-114.
4. Pereira, A.M. Composição, distribuição, densidade e riqueza de primatas em fragmentos florestais no município de Viçosa-MG. MSc Dissertation, Universidade Federal de Viçosa, Brazil, 2012.
5. Costa, A.K.S. Área de uso e composição sexo-etária de um grupo *Sapajus flavius* (Schreber, 1974) (macaco-prego-galego) na Estação Experimental de Camaratuba, Paraíba. Undergraduate dissertation, Universidade Estadual da Paraíba, Brazil, 2014.
6. Moura, R.T. Distribuição e ocorrência de mamíferos na mata atlântica do sul da Bahia. In *Corredor de biodiversidade da mata atlântica do sul da Bahia*; Prado, P.I., Landau, E.C., Moura, R.T., Pinto, L.P.S., da Fonseca, G.A.B., Eds.; Conservation International do Brasil: Ilhéus, Brazil, 2003; pp. 1-22.
7. Silva, M.A.S. Diversidade beta e distribuição espacial de espermatófitas, anfíbios, aves e primatas em fragmentos florestais no sudeste do Brasil, MSc Dissertation, Universidade Federal de Alfenas, Brazil, 2014.
8. da Silva, L.G.; Ribeiro, M.C.; Hasui, E.; da Costa, C.A.; da Cunha, R.G.T. Patch size, functional isolation, visibility and matrix permeability influences neotropical primate occurrence within highly fragmented landscapes. *PLoS ONE* **2015**, *10*, e0114025.
9. Fialho, M.S.; Valença-Montenegro, M.M.; da Silva, T.C.F.; Ferreira, J.G.; Laroque, P.O. Ocorrência de *Sapajus flavius* e *Alouatta belzebul* no centro de endemismo Pernambuco. *Notropical Primates* **2014**, *21*, 214–218.
10. Melo, F.R. Primatas e áreas prioritárias para a conservação da biodiversidade no vale do rio Jequitinhonha, Minas Gerais. PhD Dissertation, Universidade Federal de Minas Gerais, Brazil, 2004.

11. DeLuycker, A.M. Preliminary report and conservation status of the Río Mayo Titi Monkey, *Callicebus oenanthe* Thomas, 1924, in the Alto Mayo valley, Northeastern Peru. *Primate Conserv.* **2006**, 21, 33–39.
12. Veiga, L.M. Ecologia e comportamento do Cuxiu-Preto (*Chiropotes satanas*) na paisagem fragmentada da Amazônia oriental. PhD Dissertation, Universidade Federal do Pará, Brazil, 2006.
13. Zárata, D.A.; Stevenson, P.R. Behavioral ecology and interindividual distance of woolly monkeys (*Lagothrix lagothricha*) in a rainforest fragment in Colombia. In *The woolly monkey: behavior, ecology, systematic and captive research*; Defler, T.R., Stevenson, P.R., Eds.; Springer: New York, NY, USA, 2014; pp. 227-245.
14. dos Santos, R.R. Ecologia de Cuxiús (*Chiropotes satanas*) na Amazônia Oriental: perspectivas para a conservação de populações fragmentadas. MSc Dissertation, Universidade Federal do Pará, Brazil, 2002.
15. Silva, S.S.B.; Ferrari, S. Behavior patterns of Southern Bearded Sakis (*Chiropotes satanas*) in the fragmented landscape of Eastern Brazilian Amazonia. *Am. J. Primatol.* **2009**, 71, 1–7.
16. Boyle, S. A.; Lenz, B.B.; Gilbert, K.A.; Sprionello, W.R.; Gómez, M.S.; Setz, E.Z.F.; dos Reis, A.M.; da Silva, O.F.; Keuroghlian, A.; Pinto, F. Primates of the Biological Dynamics of Forest Fragments Project: a history. In *Primates in fragments: Complexity and resilience*; Marsh, L.K., Chapman, C.A., Eds.; Springer: New York, NY, USA, 2013; pp. 57-74.
17. Benchimol, M. Efeitos da fragmentação insular sobre a comunidade de primatas na Amazônia Central. MSc Dissertation, Instituto Nacional de Pesquisas da Amazônia, Brazil, 2009.
18. Gusmão, A.C.; Crispim, M.A.; Ferronato, M.L.; Silva, J.S. Primatas da Reserva Particular do Patrimônio Natural Água Boa, Cacoal, Rondônia, Brasil. *Neotropical Primates* **2014**, 21, 207–209.
19. Lopes, M.A.; Ravetta, A.; Alves, G.; Guilherme, P.; Silva, S.; Magalhães, J.L.L.; da Silva, L.V.A.; da Silva, M.N.D.; Magalhães, T.P.; Amorim, P.; Castro, L.B. Descrição e análise da fauna e flora da região do médio-baixo rio Xingu. Mamíferos Terrestres de Médio e Grande Porte, Relatório, AHE Belo Monte, 2008.
20. Oliveira, S.G.; Alfaro, J.W.L.; Veiga, L.M. Activity budget, diet, and habitat use in the critically endangered Ka'apor Capuchin Monkey (*Cebus kaapori*) in Pará State,



- Brazil: a preliminary comparison to other Capuchin Monkeys. *Am. J. Primatol.* **2014**, 76, 919–931.
21. Ferrari, S.F.; Iwanaga, S.; Ravetta, A.L.; Freitas, F.C.; Sousa, B.A.R.; Souza, L.L.; Costa, C.G.; Coutinho, P.E.G. Dynamics of primate communities along the Satarém-Cuibá highway in South-Central Brazilian Amazonia. In *Primates in fragments: Ecology and conservation*; Marsh, L.K., Eds.; Springer: New York, NY, 2003; pp. 123–144.
  22. Gusmão, A.C.; Pazzer, A.C.; Naujokat, E.M.; Domingues, S.P.; dos Santos, W.V. Primatas do Parque Natural Municipal de Pimenta Bueno, município de Pimenta Bueno, Rondônia. *Facimedit* **2009**, 1, <http://www.facimed.edu.br/o/revista/?onChange=Ler&ID=23>
  23. Dechner, A. Searching for *Alouatta palliata* in northern Colombia: considerations for the species detection, monitoring and conservation in the dry forests of Bolívar, Colombia. *Neotropical Primates* **2011**, 18, 1–8.
  24. Mejía, J.C.; López, J.A. Population density of the red howler monkey (*Alouatta seniculus*) in a tropical dry forest fragment in northwestern Colombia. *Neotropical Primates* **2011**, 18, 64–68.
  25. Ossa, J.; Galván-Guevara, S.; Fajardo-Patiño, A. Density, group composition and vertical distribution of sympatric primates in a gallery forest fragment, Colosó, Sucre – Colombia. *Revista U.D.C.A Actualidad & Divulgación Científica* **2013**, 16, 185–192.
  26. Larrotta, L.F.; González, J.F.; Rodríguez, A. Primates en un paisaje de los Montes de María, Colombia: distribución y estado poblacional de primates en la ecorregión de Montes de María, Colombia; Editorial Académica Española: Saarbrücken, Germany; 2016.
  27. Talamoni, S.A.; Motta-Junior, J.C.; Dias, M.M. Fauna de mamíferos da Estação Ecológica de Jataí e da Estação Experimental de Luiz Antônio. In *Estudos integrados em ecossistemas, Estação Ecológica de Jataí, volume 1*; Santos, J.E., Pires, J.S.R., Eds.; Editora Rima: São Carlos, SP, Brazil, 2000; pp. 317–329.
  28. dos Santos, C.F.; Bueno, B.; Casella, J. Comparação entre métodos de amostragem e eficiência de iscas na atração de mamíferos de médio e grande porte no Cerrado. *Neotrop. Biol. Conserv.* **2013**, 8, 156–164.
  29. Chiarello, A.G. Conservation value of a native forest fragment in a region of extensive agriculture. *Rev. Bras. Biol.* **2000**, 60, 237–247.

30. Oliveira, L.C.; Câmara, E.M.V.C.; Hirsch, A.; Paschoal, A.M.O.; Alvarenga, R.M.; Belarmino, M.G. *Callithrix geoffroyi* (Primates: Callitrichidae) and *Alouatta caraya* (Primates: Atelidae) in the Serra do Cipó National Park, Minas Gerais, Brazil. *Neotropical Primates* **2003**, *11*, 86–89.
31. Santiago, R. Mastofauna de médio e de grande porte da Estação Experimental Syngenta de Uberlândia – MG. *Revista Intertox de Toxicologia Risco Ambiental e Sociedade* **2016**, *9*, 132–149.
32. da Silva, R.C.; Machado, G.P.; Cruvinel, T.M.A.; Cruvinel, C.A.; Langoni, H. Frequency of *Toxoplasma gondii* antibodies in Tufted Capuchin Monkeys (*Cebus apella nigritus*) from an ecological station in the State of São Paulo, Brazil. *Pesqui. Vet. Bras.* **2013**, *33*, 251–253.
33. Martins, M.M. Density of primates in four semi-deciduous forest fragments of São Paulo, Brazil. *Biodivers. Conserv.* **2005**, *14*, 2321–2329.
34. Pyritz, L.W.; Büntge, A.B.S.; Herzog, S.K.; Kessler, M. Effects of habitat structure and fragmentation on diversity and abundance of primates in tropical deciduous forests in Bolivia. *Int. J. Primatol.* **2010**, *31*, 796–812.
35. Palacios-Silva, R.; Mandujano, S. Modelando la dinámica de ocupación de parches de selva por primates en un paisaje fragmentado de Los Tuxtlas, México. In *Avances en el estudio de los mamíferos de México II*; Lorenzo, C., Espinoza, E., Ortega, J., Eds.; Asociación Mexicana de Mastozoología, A. C.: México D.F., México, 2008; pp. 493–509.
36. Rodríguez, J. Efecto de la fragmentación del hábitat en la estructura poblacional del Mono Congo (*Alouatta palliata*) y del Mono Carablanca (*Cebus capucinus*) en el Refugio de Vida Silvestre Privado Nogal, Sarapiquí, Heredia, Costa Rica. Undergraduate Dissertation, Universidad de Costa Rica, Costa Rica, 2007.
37. González-Zamora, A.; Arroyo-Rodríguez, V.; Oyama, K.; Sork, V.; Chapman, C.A.; Stoner, F.E. Sleeping sites and latrines of Spider Monkeys in continuous and fragmented rainforests: implications for seed dispersal and forest regeneration. *PLoS ONE* **2012**, *7*, e46852.
38. Rath, T.B.; Estrada, A.; Pozo, C.; Calmé, C. Reconocimiento demográfico de *Alouatta pigra* y *Ateles geoffroyi* en la Reserva el Tormento, Campeche, México. *Neotropical Primates* **2003**, *11*, 163–167.
39. Serio-Silva, J.C.; Rico-Gray, V.; Ramos-Fernández, G. Mapping primate populations in the Yucatan Peninsula, Mexico: a first assessment. In *New perspectives in the study*

of Mesoamerican primates: Distribution, ecology, behavior, and conservation; Estrada, A., Garber, P.A., Pavelka, M.S.M, Luecke, L., Eds.; Springer: Boston, MA, USA, 2006; pp. 489-511.

40. Gómez-Marin, F.; Veá, J.J.; Rodríguez-Luna, E.; García-Orduña, F.; Canales-Espinosa, D.; Escobar, M.; Asensio, N. Food resources and the survival of a group of Howler Monkeys (*Alouatta palliata mexicana*) in disturbed and restricted habitat at Los Tuxtlas, Veracruz, Mexico. *Neotropical Primates* **2001**, *9*, 60–67.
41. Trolliet, F. Ecology of the Belizean Black Howler Monkey (*Alouatta pigra*): a comparison between two populations living in a riparian forest and on coastal limestone hills. MSc Dissertation, Université de Liège, Belgium, 2010.
42. Arias-Le, C.H.; Gamboa-Badilla, N. Influencia de la fragmentación del bosque y el manejo forestal en la composición de especies de mamíferos en el noreste de Costa Rica. In *VI Convención internacional de medio ambiente y desarrollo*, 2007.
43. Anzures-Dadda, A.; Andresen, E.; Martínez, M.L.; Manson, R.H. Absence of Howlers (*Alouatta palliata*) influences tree seedling densities in tropical rain forest fragments in Southern Mexico. *Int. J. Primatol.* **2011**, *32*, 634–651.
44. Milton, K.; Lozier, J.D.; Lacey, E.A. Genetic structure of an isolated population of Mantled Howler Monkeys (*Alouatta palliata*) on Barro Colorado Island, Panama. *Conserv. Genet.* **2009**, *10*, 347–358.
45. Carretero-Pinzón, X. An eight-year life history of a primate community in the Colombian Llanos. In *Primates in fragments: Complexity and resilience*; Marsh, K.L., Chapman, C.A., Eds.; Springer: New York, NY, USA, 2013; pp. 159-182.
46. Ortiz-Hoyos, R.D.; Pérez-Sánchez, J.F.; Racero-Casarrubia, J.; Linares-Arias, J.; Chacón, J. Densidad poblacional y estructura de grupo de *Alouatta seniculus* (Primate: Atelidae) en la zona amortiguadora del embalse URRÁ I, Tierralta, Córdoba, Colombia. *Rev. Biodivers. Neotrop.* **2015**, *5*, 131–139.
47. Roncancio, N.J.; Rojas, W.; Defler, T. Densidad poblacional de *Saguinus leucopus* en remanentes de bosque con diferentes características físicas y biológicas. *Mastozool. Neotrop.* **2011**, *18*, 105–117.
48. Alfonso, F. Densidad poblacional y ecología de *Ateles hybridus* (I. Geoffroyi- St. Hilaire, 1829) en un fragmento de bosque húmedo tropical en la Hacienda San Juan de Carare, Municipio de Cimitarra, Departamento de Santander, Colombia. Undergraduate Dissertation, Pontificia Universidad Javeriana, Colombia, 2009.

49. de Luna, A.G.; García-Morera, Y.; Link, A. Behavior and ecology of the White-Footed Tamarin (*Saguinus leucopus*) in a fragmented landscape of Colombia: small bodied primates and seed dispersal in Neotropical forests. *Trop. Conserv. Sci.* **2016**, *9*, 788–808.
50. Link, A.; Galvis, N.; Marquez, M.; Guerrero, J.; Solano, C.; Stevenson, P.R. Diet of the critically endangered Brown Spider Monkey (*Ateles hybridus*) in an inter-Andean lowland rainforest in Colombia. *Am. J. Primatol.* **2012**, *74*, 1097–1105.
